# Supplementary material for: Determination of polyphenols in Schinus terebinthifolius Raddi bark extracts and chemometric analysis
Source: Royal Society of Chemistry journal article supplement (doi:10.1039/d0ay00197j), 2020-01-01
Supplement: d0ay00197j1.pdf [file d0ay00197j1.pdf]

## Supplementary material

### Determination of Polyphenols in *Schinus terebinthifolius* Raddi bark extracts and chemometric analysis

Vitor Hugo Miguez<sup>a</sup>, Jorge Mauricio David<sup>\*a</sup>, Juceni Pereira David<sup>a\*</sup>

<sup>a</sup> Instituto de Química, Universidade Federal da Bahia, 40170-290 - Salvador, BA, Brazil

\* Corresponding author at: Instituto de Química, Universidade Federal da Bahia, 40170-290 - Salvador, BA, Brazil

E-mail address: [jmdavid@ufba.br](mailto:jmdavid@ufba.br), [juceni@ufba.br](mailto:juceni@ufba.br)

**Table 1S:** Elution parameters of the polyphenolics employed in the chemical characterization of *S. terebinthifolius*

| Standard           | Rt    | Wb    | k     | $\alpha$ | N          | Rs     |
|--------------------|-------|-------|-------|----------|------------|--------|
| Gallic acid        | 9.97  | 0.345 | 1.00  | 3.23     | 13362,02   | 26.02  |
| Catechin           | 21.12 | 0.512 | 3.25  | 1.54     | 27225.00   | 24.04  |
| Chlorogenic acid   | 29.87 | 0.216 | 5.00  | 1.62     | 305972.87  | 64.04  |
| <i>Epicatechin</i> | 45.40 | 0.269 | 8.13  | 1.63     | 455750,47  | 89.58  |
| Quercetin          | 71.02 | 0.303 | 13.28 | 1.01     | 879014.55  | 3.33   |
| Rutin              | 71.89 | 0.219 | 13.45 | 1.02*    | 1724124.88 | 14.25* |

\* Where Rt=retention time of the peak; Wb=width of the peak base; k=retention factor;  $\alpha$ =separation factor; N=number of theoretical plates and Rs=resolution.; \* Values for the previous peak.

Table 2S. Summary of the ANOVA output for linear regression analysis by HPLC analyses.

| Standard                                     | MS <sub>between</sub> | MS <sub>Within</sub>  | F <sub>calc</sub> | <i>p</i> -Value |
|----------------------------------------------|-----------------------|-----------------------|-------------------|-----------------|
| EPI                                          | 1.14x10 <sup>3</sup>  | 7.91x10 <sup>2</sup>  | 1.45              | 0.248           |
| GAL                                          | 2.44x10 <sup>9</sup>  | 1.51x10 <sup>9</sup>  | 1.61              | 0.205           |
| QUE                                          | 9.87x10 <sup>12</sup> | 3.42x10 <sup>12</sup> | 2.88              | 0.06            |
| RUT                                          | 3.69x10 <sup>2</sup>  | 1.38x10 <sup>2</sup>  | 2.67              | 0.06            |
| CAT                                          | 1.38x10 <sup>4</sup>  | 7.30x10 <sup>3</sup>  | 1.89              | 0.150           |
| CLO                                          | 1.43x10 <sup>3</sup>  | 9.27x10 <sup>2</sup>  | 1.54              | 0.224           |
| MS = mean square; F <sub>critic</sub> = 2.90 |                       |                       |                   |                 |

**Table 3S:** Evaluation of method robustness by modifying the flow of the HPLC of *S. terebinthifolius* standards.

| Compound   | Flow(mLmin <sup>-1</sup> ) | Conc. (%)<br>(A1, A2, A3) | Average (%) | DP   | DPR (%) |
|------------|----------------------------|---------------------------|-------------|------|---------|
| <b>EPI</b> | Proposed method            | 100.07                    | 100.50      | 0.70 | 0.69    |
|            |                            | 101.30                    |             |      |         |
|            |                            | 100.12                    |             |      |         |
|            | 1.2                        | 100.06                    | 100.11      | 0.22 | 0.22    |
|            |                            | 99.92                     |             |      |         |
|            |                            | 100.35                    |             |      |         |
|            | 0.8                        | 105.01                    | 105.85      | 0.73 | 0.69    |
|            |                            | 106.32                    |             |      |         |
|            |                            | 106.22                    |             |      |         |
| <b>GAL</b> | Proposed method            | 101.05                    | 99.93       | 1.15 | 1.15    |
|            |                            | 98.76                     |             |      |         |
|            |                            | 99.99                     |             |      |         |
|            | 1.2                        | 108.05                    | 104.21      | 4.02 | 3.85    |
|            |                            | 104.55                    |             |      |         |
|            |                            | 100.04                    |             |      |         |
|            | 0.8                        | 105.24                    | 107.88      | 2.54 | 2.36    |
|            |                            | 100.31                    |             |      |         |
|            |                            | 100.09                    |             |      |         |
| <b>QUE</b> | Proposed method            | 100.11                    | 99.79       | 0.32 | 0.32    |
|            |                            | 99.48                     |             |      |         |
|            |                            | 99.77                     |             |      |         |
|            | 1.2                        | 105.21                    | 104.83      | 0.53 | 0.51    |
|            |                            | 105.06                    |             |      |         |
|            |                            | 104.22                    |             |      |         |
|            | 0.8                        | 109.15                    | 108.75      | 0.36 | 0.33    |

|            |                 |        |        |      |      |
|------------|-----------------|--------|--------|------|------|
|            |                 | 108.45 |        |      |      |
|            |                 | 108.66 |        |      |      |
| <b>RUT</b> | Proposed method | 99.80  | 100.64 | 1.61 | 1.60 |
|            |                 | 99.63  |        |      |      |
|            |                 | 102.49 |        |      |      |
|            | 1.2             | 105.14 | 105.49 | 1.07 | 1.01 |
|            |                 | 104.64 |        |      |      |
|            |                 | 106.69 |        |      |      |
|            | 0.8             | 108.80 | 107.19 | 2.57 | 2.40 |
|            |                 | 108.56 |        |      |      |
|            |                 | 104.23 |        |      |      |
| <b>CAT</b> | Proposed method | 99.71  | 101.53 | 2.09 | 2.06 |
|            |                 | 101,06 |        |      |      |
|            |                 | 103.81 |        |      |      |
|            | 1.2             | 104.89 | 106.10 | 1.48 | 1.39 |
|            |                 | 105.66 |        |      |      |
|            |                 | 107.74 |        |      |      |
|            | 0.8             | 108.68 | 105.68 | 3.41 | 3.23 |
|            |                 | 106.39 |        |      |      |
|            |                 | 101.97 |        |      |      |
| <b>CLO</b> | Proposed method | 100.38 | 102.39 | 1.98 | 1.94 |
|            |                 | 102.44 |        |      |      |
|            |                 | 104.35 |        |      |      |
|            | 1.2             | 105.28 | 106.73 | 1.47 | 1.38 |
|            |                 | 106.70 |        |      |      |
|            |                 | 108.21 |        |      |      |
|            | 0.8             | 107.53 | 104.30 | 3.18 | 3.05 |
|            |                 | 104.18 |        |      |      |
|            |                 | 101.18 |        |      |      |

**Table 4S:** Values of "m", " b " e "R" obtained from linear regression of analytical curve.

| Standard | m      | b      | R <sup>2</sup> |
|----------|--------|--------|----------------|
| EPI      | 0.0460 | 0.4478 | 0.9993         |
| GAL      | 0.0681 | 0.1223 | 0.9939         |
| QUE      | 0.0262 | 0.0999 | 0.9943         |
| RUT      | 0.0519 | 0.4872 | 0.9951         |
| CAT      | 0.1061 | 0.4934 | 0.9961         |
| CLO      | 0.1825 | 1.6302 | 0.9979         |



**Table 6S:** Analyses of variance (ANOVA) from HPLC/DAD and UV determinations of the content of polyphenols in *S. terebinthifolius*.

| Variation       | gel | SQ       | MQ       | F                | P - Valor | F significance meaning |
|-----------------|-----|----------|----------|------------------|-----------|------------------------|
| Between groups  | 1   | 0.00216  | 0.028855 | <b>0.010755*</b> | 0.04875   | 3.9139                 |
| Into the groups | 130 | 348.7743 | 2.682879 |                  |           |                        |
| Total           | 139 | 348.8031 |          |                  |           |                        |

\* Significance  $p < 0.05$





Figure 1S: Spots of *S. terebinthifolius* samples collect (Bahia State, Brazil)



**Figure 2S:** Paired PCA of data obtained by UV and HPLC/DAD analysis in the samples of *S. terebinthifolius* by por PC1 e PC2. a) Dispersion diagram of samples in three groups (G1, G2, G3). b) Graphic loadings of the six analytes for PC1 and PC2.



Figure 3S: UV spectra (200 a 400 nm) of samples of *S. terebinthifolius* with addition of different concentrations of standards. (a): Epicatechin, (b): gallic acid, (c): quercetin, (d): chlorogenic acid, (e): catechin and (f): rutin.
